## 1 Early sports specialization in Japanese young soccer players and related factors

Short title: Sports Specialization in Japanese Young Soccer Players

Yasuharu NAGANO<sup>1</sup>, Shogo SASAKI<sup>2</sup>, Ayako HIGASHIHARA<sup>3</sup>, Takashi OYAMA<sup>4</sup>

<sup>1</sup>Department of Sports and Health Science, Japan Women's College of Physical Education, 8-19-1, Kitakarasuyama, Setagaya, Tokyo, Japan

E-mail: [nagano323@gmail.com](mailto:nagano323@gmail.com)

<sup>2</sup> Department of Competitive Sports, School of Physical Education, Tokai University, 4-1-1 Kitakaname, Hiratsuka, Kanagawa, Japan

E-mail: [s\\_sasaki@tsc.u-tokai.ac.jp](mailto:s_sasaki@tsc.u-tokai.ac.jp)

<sup>3</sup> Institute of Physical Education, Keio University, 4-1-1, Hiyoshi, Kouhoku, Yokohama, Kanagawa, Japan

E-mail: [higashihara@keio.jp](mailto:higashihara@keio.jp)

<sup>4</sup> Faculty of Economics, Teikyo University, 359 Otsuka, Hachioji, Tokyo, Japan

E-mail: [takashi.oyama1201@gmail.com](mailto:takashi.oyama1201@gmail.com)

Corresponding author:

Yasuharu Nagano, PhD

8-19-1, Kitakarasuyama, Setagaya, Tokyo 157-8565, Japan

E-mail: [nagano.yasuharu@jwcpe.ac.jp](mailto:nagano.yasuharu@jwcpe.ac.jp)

Tel: +81-3-3300-5437; Fax: +81-3-3300-5437

### 3 **Abstract**

4 Although understanding the status of sports participation is essential for preventing injuries in  
5 young athletes, the level of specialization and relevant information in Japan is unknown. This  
6 study aimed to clarify the status of sports specialization and examine the relationships  
7 between specialization and training status in Japanese young soccer players. Four hundred  
8 Japanese young male soccer players were included. The players' parents completed a web  
9 questionnaire that consisted of three-point questions regarding specialization and training  
10 status (year, days of playing soccer, age when starting soccer). The level of specialization and  
11 accompanying information were calculated, and data were compared by specialization status.  
12 Of the participants, 53.8% demonstrated a high level of specialization. In addition, 74.5%  
13 considered soccer more important than other sports, 89.0% trained in soccer for more than 8  
14 months of the year, and 74.0% had quit other sports to focus on soccer or played only soccer.  
15 The proportion of participants who played only soccer was significantly higher in the high-  
16 specialization group (37.6%) than in the moderate-specialization (22.5%;  $P < .01$ ) and low-  
17 specialization (7.1%;  $P < .01$ ) groups. By specialization status at grades 4 to 6 (9–12 years),  
18 40.3% of participants demonstrated a high level of specialization. Young Japanese soccer  
19 players tend toward early specialization. Factors contributing to the high-specialization level  
20 are being active throughout the year and rarely playing other sports. Training volume should  
21 be controlled in children of this age with avoidance of early specialization.

22

23 **Key Terms:** children; injury and prevention; musculoskeletal; youth; history

24

25

26

27

## 28 Introduction

29 For children, soccer is efficacious in improving physical capacity, health-related  
30 fitness parameters, and self-esteem.[1] Soccer has been a highly popular sport for young  
31 athletes. Meanwhile, early specialization in a particular sport and increased participation in  
32 organized sports with increased training volume have become prevalent for improving  
33 athletic performance and achieving social success. However, a previous meta-analysis found  
34 that sport specialization in athletes younger than 18 years was associated with an increased  
35 risk of musculoskeletal overuse injuries.[2] Therefore, position statements from sports  
36 medicine organizations have generally been consistent in recommending against early sport  
37 specialization.[3] To provide fundamental information for injury prevention in young  
38 athletes, specialization status must be clarified.

39 Sports specialization is defined as “intense, year-round training in a single sport at the  
40 exclusion of other sports.”[3, 4] To evaluate the degree of sports specialization, the three-  
41 point Jayanthi scale [3, 4] is popularly used and is based on three key components: year-  
42 round training, choosing a main sport, and quitting other sports. Previous studies have  
43 reported on the specialization status of young athletes. Post et al [5] reported that among all  
44 youth athletes (mean age 14.2 years), 41.8% had high-specialization status, and this  
45 proportion was 35.3% among soccer players. Post et al [6] also reported that the status of high  
46 sports specialization by age in young athletes including soccer as follows: 30.2% at 12 years  
47 of age, 38.1% at 13 years of age, and 42.3% at 14 years of age. Bell et al [7] reported that the  
48 proportion of high-specialization status of youth male athletes including soccer (mean age  
49 15.7 years) was 36.9%. However, there have been no reports of the sports specialization  
50 status of Japanese young athletes.

51 One reason for specialization is the status of other sports played. Although a previous  
52 study showed a high percentage of young students (77.9%) played multiple sports,[7] in

53 Japan, the proportion of children who play multiple sports is very low, ranging from 10.0%  
54 [8] to 17.4% [9] for children in grades 7–9 and 22.9% for soccer players.[9] In addition,  
55 some athletes have only ever played a single sport, and athletes who continued a single  
56 specific sport from elementary school age are more likely to have overuse disorders,  
57 especially in team sports.[10] Consequently, it is possible that young Japanese athletes are  
58 highly specialized due to a low percentage of multiple sports and that their specialization is  
59 increasing as they have no or little athletic experience other than soccer.

60 Another factor related to the level of specialization is training volume. In young  
61 soccer players, training volume of >5 days per week playing soccer was related to overuse  
62 injuries.[5] In some recent studies in Japan, the number of days of weekly activity was  
63 related to acute injuries and overuse injuries during grade 7–9.[9] In addition, the number of  
64 training days per week was related to growth-related knee and heel pain in Japanese junior  
65 soccer players.[11] Other studies have focused on the number of months of sports per year,  
66 with more months spent playing sports being associated with acute injuries and overuse  
67 injuries.[5] Although it is assumed that training volume increases with the level of  
68 specialization, the relationship between training volume and the level of specialization in  
69 current young Japanese soccer players remains unclear.

70 Although understanding the status of sports participation is essential to prevent  
71 injuries in young athletes, the level of specialization and relevant information in Japan  
72 remains unknown. The purpose of this study was to clarify the status of sports specialization  
73 and examine the relationships between specialization and training status (only sports carrier  
74 of soccer, days spent playing soccer, and age when starting soccer) among Japanese young  
75 soccer players. Our first hypothesis is that the specialization status of Japanese young soccer  
76 players is higher than that reported in previous studies and related to only sports carrier of

77 soccer. Our second hypothesis is that high sports specialization of Japanese young soccer  
78 players is related to more days per week of playing soccer.

## 79 **Materials and Methods**

### 80 **Study setting**

81 This study was a cross-sectional study of data obtained from a web-based  
82 questionnaire. The questionnaire was randomly distributed to people registered with a web  
83 questionnaire supplier (Rakuten Insight Inc.). The aim was to recruit 400 subjects whose  
84 male child played soccer and attended school in grades 8 (13–14 years) or 9 (14–15 years).  
85 According to the power analysis,[12] the required sample size for a descriptive study of a  
86 dichotomous variable ( $P = .40$ ,  $W = 0.10$ , confidence level = 95%) was 369. Based on this  
87 value, we targeted a sample size of 400. We recruited an equal number of participants from  
88 grades 8 and 9. First, we randomly distributed a screening questionnaire to 13,852 people  
89 registered with a web questionnaire supplier. A total of 6,099 of the 13,852 individuals  
90 participated in the screening survey. Next, based on the results of the screening survey, 723  
91 parents of young male soccer players in the seventh to ninth grades participated in the main  
92 survey. Finally, 6 data points were excluded through data cleaning, and 600 out of the 717  
93 collected datasets, with 200 from each school grade, were randomly selected by a  
94 questionnaire supplier. A series of surveys achieved the desired sample size in 3 days  
95 (August 1–3, 2022). Although parents of seventh-grade players also responded to the survey,  
96 they were excluded from this study because their schools had changed from elementary to  
97 junior high in the previous year, and their soccer-playing environment had largely changed at  
98 the half-year. All respondents provided informed consent by displaying and clicking on a  
99 screen before participating in the study. Respondents who agreed to participate in this survey

100 answered the questionnaire voluntarily, and information was collected without revealing the  
101 identity of any individual participant to the researcher. The ethical review board of the  
102 authors' institution approved the present study. This research was conducted based on the  
103 principles of the Declaration of Helsinki.

## 104 **Electronic questionnaire**

105 The questionnaire consisted of four screening questions and six main questions (Table 1).  
106 The screening survey assessed whether the respondent had a child with the following criteria:  
107 (1) currently playing soccer in the club team, (2) in seventh to ninth grades, (3) male, and (4)  
108 playing soccer regularly for more than 1 day per week. If answers to the screening questions  
109 matched the inclusion criteria, the questionnaire continued to the next main survey. If the  
110 participant did not match even one of the inclusion criteria, the respondents were excluded  
111 from the survey. The main questions asked respondents about their sports activity (year, age  
112 at which they started playing soccer, participation in sports during seventh to ninth grades  
113 and during fourth to sixth grades), and status of specialization during the seventh to ninth  
114 grades and fourth to sixth grades. Status of sport specialization was determined with a widely  
115 used 3-point specialization scale.[3, 4] This scale was calculated from a series of three  
116 questions that asked (1) if the athlete quit other sports to focus on soccer, (2) if they viewed  
117 soccer as more important than other sports, and (3) if they trained or participated in soccer  
118 more than 8 months of the year.[13] Specialization was classified as "high" for those who  
119 met all three questions, "moderate" for those who met two, and "low" for those who met only  
120 0 to 1. Those who answered " No, plays only soccer " to question 1 (Q6) were considered to  
121 meet this criterion.

122

123

124

125 **Table 1: Questionnaire regarding sports specialization and related factors in young male soccer**

126 **players**

127

---

**Screening questionnaire (SC1-5)**

---

**SC1. Does your child currently play soccer in club teams?**

Yes/No/No children

**SC2. In what grade is your child who plays soccer?**

7th grade/8th grade/9th grade/Others

**SC3. What is the sex of your child as described in SC2?**

Male/Female

**SC4. How many days per week has your child played soccer (including practice and games) in the past 12 months?**

1 day per week/2 days per week/3 days per week/4 days per week/5 days per week/6 days per week/7 days per week/Others (less than 1 day per week)

---

**Main questionnaire (Q1-8)**

---

**Please answer regarding your child who plays soccer as described in the previous questionnaire (SC1-5)**

---

**Q1. How old is your child?**

\_years and \_months old

**Q2. At what age did your child start playing soccer, excluding recreational?**

\_years and \_months old

**Q3-1. Please select the sports your child participated in during seventh to ninth grade.**

Soccer/Swimming/Gymnastics/Track and field/Baseball/Softball/Volleyball/Basketball/Tennis/Soft tennis/Badminton/Table tennis/Kendo/Judo/Karate/Other ( )/No sports activity

**Q3-2. Please select the sports your child participated in during fourth to sixth grade.**

---

Soccer/Swimming/Gymnastics/Track and field/Baseball/Softball/Volleyball/Basketball/Tennis/Soft tennis/Badminton/Table tennis/Kendo/Judo/Karate/Other ( )/No sports activity

**Q4-1. Did your child consider soccer more important than other sports during seventh to ninth grade?**

Yes/No

**Q4-2. Did your child consider soccer more important than other sports during fourth to sixth grade?**

Yes/No

**Q5-1. How many months per year has your child played football (including practice and games) in the last 12 months during seventh to ninth grade?**

1 month/ 2 months/ 3 months/ 4 months/ 5 months/ 6 months/ 7 months/ 8 months/ 9 months/ 10 months/ 11 months/ 12 months

**Q5-2. How many months per year has your child played football (including practice and games) in the last 12 months during fourth to sixth grade?**

1 month/ 2 months/ 3 months/ 4 months/ 5 months/ 6 months/ 7 months/ 8 months/ 9 months/ 10 months/ 11 months/ 12 months

**Q6. Did your child quit other sports to focus on soccer?**

Yes, quit before third grade/Yes, quit during fourth to sixth grade/Yes, quit during seventh to ninth grade/No, continued other sports/No, plays only soccer

---

128

## 129 **Statistical analysis**

130 We summarized the data as means and standard deviations, frequencies and proportions (%)  
131 by specialization status. Using chi-square test, we compared the proportion of those who play  
132 only soccer by specialization status. Days of playing soccer per week and age starting soccer  
133 were compared by specialization status using one-way analysis of variance, along with  
134 Bonferroni correction performed as a post hoc test. All statistical analyses were performed



135 using SPSS Statistics version 19.0 for Windows (IBM; Brush Prairie, WA, USA), and results  
136 were considered statistically significant with an  $\alpha$  level of  $P < .05$ .

## 137 **Results**

138 A total of 400 participants (mean age,  $13.9 \pm 0.9$  years) completed the questionnaire. Table 2  
139 presents the proportion of participants classified as high, moderate, and low specialization:  
140 53.8% of participants demonstrated a high level of specialization, 32.3% demonstrated a  
141 moderate level of specialization, and 14.0% of participants demonstrated a low level of  
142 specialization. Among the participants, 74.5% considered soccer more important than other  
143 sports, 89.0% trained for more than 8 months of the year in soccer, and 74.0% had quit other  
144 sports to focus on soccer or playing only soccer. In total, 81.5% of participants and 92.1% of  
145 the high-specialization group trained 12 months of the year. The proportion of participants  
146 who playing only soccer was significantly higher in the high-specialization group (37.6%)  
147 than in the moderate-specialization (22.5%;  $P < .01$ ) and low-specialization (7.1%;  $P < .01$ )  
148 groups, and it was significantly higher in the moderate- compared with the low-specialization  
149 group ( $P < .01$ ). The number of days spent playing soccer per week was significantly greater  
150 in the high-specialization group ( $4.6 \pm 1.2$  days, mean  $\pm$  SD) than in the moderate- ( $4.1 \pm 1.5$   
151 days;  $P < .01$ ) and low-specialization ( $3.8 \pm 1.7$  days;  $P < .01$ ) groups. The age at which the  
152 participant started playing soccer was significantly higher in the high-specialization group  
153 ( $7.8 \pm 2.7$  years) than in the moderate-specialization group ( $9.0 \pm 2.9$  years;  $P < .01$ ). In  
154 specialization status at grades 4 to 6 (9–12 years), 40.3% of participants demonstrated a high  
155 level of specialization, and 71.6% of the high-specialization group already demonstrated a  
156 high level of specialization.

157

158

159 **Table 2. Frequency of sports participation and prevalence of injury**

|                             | Specialization Status |               |           |                 |           |                 |       |          |
|-----------------------------|-----------------------|---------------|-----------|-----------------|-----------|-----------------|-------|----------|
|                             | Low                   |               | Moderate  |                 | High      |                 | Total |          |
| Number                      | 56                    | (14.0%)       | 129       | (32.3%)         | 215       | (53.8%)         | 400   | (100.0%) |
| Soccer more important       |                       |               |           |                 |           |                 |       |          |
| Yes                         | 3                     | (5.4%)        | 80        | (62.0%)         | 215       | (100.0%)        | 298   | (74.5%)  |
| No                          | 53                    | (94.6%)       | 49        | (38.0%)         | 0         | (0.0%)          | 102   | (25.5%)  |
| Months of participation     |                       |               |           |                 |           |                 |       |          |
| 1                           | 8                     | (14.3%)       | 1         | (0.8%)          | 0         | (0.0%)          | 9     | (2.3%)   |
| 2                           | 0                     | (0.0%)        | 2         | (1.6%)          | 0         | (0.0%)          | 2     | (0.5%)   |
| 3                           | 3                     | (5.4%)        | 4         | (3.1%)          | 0         | (0.0%)          | 7     | (1.8%)   |
| 4                           | 4                     | (7.1%)        | 2         | (1.6%)          | 0         | (0.0%)          | 6     | (1.5%)   |
| 5                           | 1                     | (1.8%)        | 3         | (2.3%)          | 0         | (0.0%)          | 4     | (1.0%)   |
| 6                           | 7                     | (12.5%)       | 6         | (4.7%)          | 0         | (0.0%)          | 13    | (3.3%)   |
| 7                           | 1                     | (1.8%)        | 2         | (1.6%)          | 0         | (0.0%)          | 3     | (0.8%)   |
| 8                           | 1                     | (1.8%)        | 2         | (1.6%)          | 4         | (1.9%)          | 7     | (1.8%)   |
| 9                           | 1                     | (1.8%)        | 1         | (0.8%)          | 3         | (1.4%)          | 5     | (1.3%)   |
| 10                          | 1                     | (1.8%)        | 5         | (3.9%)          | 6         | (2.8%)          | 12    | (3.0%)   |
| 11                          | 0                     | (0.0%)        | 2         | (1.6%)          | 4         | (1.9%)          | 6     | (1.5%)   |
| 12                          | 29                    | (51.8%)       | 99        | (76.7%)         | 198       | (92.1%)         | 326   | (81.5%)  |
| Other sports                |                       |               |           |                 |           |                 |       |          |
| Playing only soccer         | <b>4</b>              | <b>(7.1%)</b> | <b>29</b> | <b>(22.5%)*</b> | <b>83</b> | <b>(38.6)**</b> | 116   | (29.0%)  |
| Quit before grade 3 (–9 y)  | 2                     | (3.6%)        | 8         | (6.2%)          | 36        | (16.7%)         | 46    | (11.5%)  |
| Quit at grades 4–6 (9–12 y) | 1                     | (1.8%)        | 24        | (18.6%)         | 73        | (34.0%)         | 98    | (24.5%)  |
| Quit after grade 7 (12 y–)  | 5                     | (8.9%)        | 8         | (6.2%)          | 23        | (10.7%)         | 36    | (9.0%)   |

|                                              |                  |                  |                    |             |
|----------------------------------------------|------------------|------------------|--------------------|-------------|
| Continuing other sports                      | 44 (78.6%)       | 60 (46.5%)       | 0 (0.0%)           | 104 (26.0%) |
| Days of playing soccer, mean (SD), d/wk      | <b>3.8 (1.7)</b> | <b>4.1 (1.5)</b> | <b>4.6 (1.2)**</b> | 4.3 (1.4)   |
| Age starting soccer, mean (SD), y            | 8.8 (3.0)        | 9.0 (2.9)        | <b>7.8 (2.7)#</b>  | 8.3 (2.8)   |
| Specialization status at grades 4–6 (9–12 y) |                  |                  |                    |             |
| Other sports                                 | 16 (28.6%)       | 25 (19.4%)       | 21 (9.8%)          | 62 (15.5%)  |
| Low                                          | 36 (64.3%)       | 15 (11.6%)       | 7 (3.3%)           | 58 (14.5%)  |
| Moderate                                     | 4 (7.1%)         | 82 (63.6%)       | 33 (15.3%)         | 119 (29.8%) |
| High                                         | 0 (0.0%)         | 7 (5.4%)         | 154 (71.6%)        | 161 (40.3%) |

---

Values in bold font indicate significantly different between groups.

\*Significantly different from low level of specialization ( $P < .01$ ).

\*\*Significantly different from low and moderate level of specialization ( $P < .01$ ).

#Significantly different from moderate level of specialization ( $P < .01$ ).

160

161

## 162 **Discussion**

163 The results of this study showed that 53.8% of young Japanese soccer players had a high-  
164 specialization level, and 40.3% were already at a high level of specialization when they were  
165 in grades 4 to 6. Factors that contributed to the high-specialization level were being active  
166 throughout the year and rarely continuing to play other sports. We found that, also related to  
167 the high-specialization level, the athletes had no previous experience in sports other than  
168 soccer, and they were active more days per week. These results were consistent with our  
169 hypothesis. The level of specialization of young Japanese athletes has not been previously  
170 determined, and the results of this study may provide a baseline for comparing the sporting  
171 environment of young athletes with the findings of other studies.

172 The level of specialization of young Japanese soccer players in this study was higher  
173 than in previous research.[5-7] In addition, their level of specialization in grades 4–6 was  
174 similar to that reported in previous studies with older participants.[5, 6] Because high  
175 specialization is associated with the occurrence of overuse injuries,[14] the high  
176 specialization of young Japanese soccer players potentially threatens their health status. In  
177 fact, the incidence of growth-related injuries among young Japanese soccer players [11, 15] is  
178 higher than that reported in a previous study from another country.[16] Osgood–Schlatter  
179 disease, which is most likely to be a problem in soccer players, tends to occur at the age of  
180 this study’s participants.[17] Soccer-related motions, including kicking, running, landing,  
181 and cutting, place a substantial load on knee extension, and the repetition of these loads is  
182 associated with a higher risk of developing Osgood–Schlatter disease.[18] To prevent these  
183 injuries, excessive training associated with early specialization must be avoided.

184 One reason for the high level of specialization was the number of months of activity  
185 per year. Although the criterion for specialization is  $\geq 8$  months of activity per year,[3, 4]  
186 most of the participants in present study were active throughout the year. Sports activities for

187 young players in Japan are typically conducted year-round rather than seasonally, and the  
188 present study clearly illustrates this situation. The number of months active per year was also  
189 related to the occurrence of overuse disorder,[6] but it is not realistic to control the number  
190 of months active in a situation in which most players are active throughout the year. The  
191 results of the present study showed significant differences in the number of weekly activity  
192 days between the levels of specialization, which might be useful for controlling the amount of  
193 training.

194 Another reason for the high level of specialization was the low implementation of  
195 playing sports other than soccer. Only 26% of the participants continued to play other sports,  
196 which is much lower than the proportion reported in the previous study (77.9%).[7]  
197 Furthermore, approximately 30% of the participants had no experience in sports other than  
198 soccer, and 38.6% of those with a high level of specialization found themselves in a situation  
199 where they had no experience in sports other than soccer. Meanwhile, although the age at  
200 which participants started playing soccer was similar to that in a previous study,[6] those  
201 with a high level of specialization started soccer at an earlier age. This means that in Japan,  
202 especially among the U12 and U15 age groups, soccer is immensely popular, with numerous  
203 teams available,[19] resulting in a strong tendency for specialization to occur at an earlier  
204 stage in a player's sports journey. From the perspective of long-term athlete  
205 development,[20] children are encouraged to engage in multiple sports, especially team ball  
206 sports, as early specialization in a single sport can result in an increased risk of overuse  
207 injuries in later youth stages.[3, 10] However, athletes who play multiple sports are at risk of  
208 increasing their total training volume,[9] which should be controlled.

209 This study has several limitations. First, this was a cross-sectional study with a self-  
210 reported questionnaire in which parents recalled previous information. Thus, there is the  
211 possibility of recall bias in the results. However, we assumed that information on sports

212 experience over the past several years can be collected satisfactorily. Second, the  
213 relationships between sports specialization and success or performance in the sports were not  
214 evaluated. Finally, we did not examine the relationship between sports specialization and the  
215 occurrence of injuries. The influence of sport specialization on injury occurrence and future  
216 injury risk in soccer players should be examined in the future. However, the result of the  
217 present study can provide a foundation for these future studies.

## 218 **Conclusion**

219 We clarified the status of sports specialization and the relationships between  
220 specialization and training status in Japanese young soccer players. Japanese young soccer  
221 players have a tendency toward early sports specialization. Factors that contributed to the  
222 high-specialization level were being active throughout the year and rarely continuing to play  
223 other sports. The training volume should be controlled in children of this age, with early  
224 specialization should be avoided.

225

## **Acknowledgments**

Funding: This work was supported by the JSPS KAKENHI Grant-in-Aid for Scientific  
Research (C) (grant number 22K11587) and the research grant of Tokyo Ariake University of  
Medical and Health Sciences in 2021.

226

227

228

229

230

231

## 232 **References**

- 233 1. Faude O, Kerper O, Multhaupt M, Winter C, Beziel K, Junge A, et al. Football to  
234 tackle overweight in children. *Scand J Med Sci Sports*. 2010;20(suppl 1):103-110.
- 235 2. Bell DR, Post EG, Biese K, Bay C, Valovich McLeod T. Sport specialization and risk  
236 of overuse injuries: a systematic review with meta-analysis. *Pediatrics*.  
237 2018;142(3):e20180657.
- 238 3. Jayanthi NA, Post EG, Laury TC, Fabricant PD. Health consequences of youth sport  
239 specialization. *J Athl Train*. 2019;54(10):1040-1049.
- 240 4. Jayanthi N, Pinkham C, Dugas L, Patrick B, Labella C. Sports specialization in young  
241 athletes: evidence-based recommendations. *Sports Health*. 2013;5(3):251-257.
- 242 5. Post EG, Biese KM, Schaefer DA, Watson AM, McGuine TA, Brooks MA, et al.  
243 Sport-specific associations of specialization and sex with overuse injury in youth athletes.  
244 *Sports Health*. 2020;12(1):36-42.
- 245 6. Post EG, Trigsted SM, Riekena JW, Hetzel S, McGuine TA, Brooks MA, et al. The  
246 association of sport specialization and training volume with injury history in youth athletes.  
247 *Am J Sports Med*. 2017;45(6):1405-1412.
- 248 7. Bell DR, Post EG, Trigsted SM, Hetzel S, McGuine TA, Brooks MA. Prevalence of  
249 sport specialization in high school athletics: a 1-year observational study. *Am J Sports Med*.  
250 2016;44(6):1469-1474.
- 251 8. Shigematsu R, Katoh S, Suzuki K, Nakata Y, Sasai H. Sports specialization and  
252 sports-related injuries in Japanese school-aged children and adolescents: a retrospective  
253 descriptive study. *Int J Environ Res Public Health*. 2021;18(14):7369.
- 254 9. Nagano Y, Oyama T. Association of sports sampling and training frequency with  
255 injury among school-age athletes in Japan. *Phys Sportsmed*. 2023;51(1):20-26.

- 256 10. Nagano Y, Oyama T. Early sport specialization trends and injuries in former high  
257 school athletes specialized in sports. *Open Access J Sports Med.* 2023;14:1-7.
- 258 11. Sasaki S, Nagano Y, Koyama K. Factors associated with knee and heel pain in  
259 children: an observational web-based survey for 1,200 parents with young Japanese  
260 footballers aged in 8–12 years. *EJSPORT.* 2023;2(2):59-67.
- 261 12. Hulley SB, Cummings SR, Browner WS, Grady DG, Newman TB. *Designing  
262 Clinical Research.* 4th ed. Philadelphia: Lippincott Williams & Wilkins; 2013.
- 263 13. Post EG, Thein-Nissenbaum JM, Stiffler MR, Brooks MA, Bell DR, Sanfilippo JL, et  
264 al. High school sport specialization patterns of current division I athletes. *Sports Health.*  
265 2017;9(2):148-153.
- 266 14. Bell DR, Post EG, Trigsted SM, Schaefer DA, McGuine TA, Watson AM, et al. Sport  
267 specialization characteristics between rural and suburban high school athletes. *Orthop J  
268 Sports Med.* 2018;6(1):2325967117751386.
- 269 15. Iwame T, Matsuura T, Suzue N, Iwase J, Uemura H, Sairyō K. Factors associated  
270 with knee pain and heel pain in youth soccer players aged 8 to 12 years. *Orthop J Sports  
271 Med.* 2019;7(11):2325967119883370.
- 272 16. Materne O, Chamari K, Farooq A, Weir A, Holmich P, Bahr R, et al. Injury incidence  
273 and burden in a youth elite football academy: a four-season prospective study of 551 players  
274 aged from under 9 to under 19 years. *Br J Sports Med.* 2021;55(9):493-500.
- 275 17. Materne O, Chamari K, Farooq A, Tabben M, Weir A, Holmich P, et al. Shedding  
276 light on incidence and burden of physal injuries in a youth elite football academy: A 4-  
277 season prospective study. *Scand J Med Sci Sports.* 2022;32(1):165-176.
- 278 18. Itoh G, Ishii H, Kato H, Nagano Y, Hayashi H, Funasaki H. Risk assessment of the  
279 onset of Osgood-Schlatter disease using kinetic analysis of various motions in sports. *PLoS  
280 One.* 2018;13(1):e0190503.



281 19. Association JF. Data box 2022. [cited 14 October 2023] . Tokyo: Japan Football

282 Association 2022. Available from:

283 [https://www.jfa.jp/eng/about\\_jfa/organization/databox/team.html](https://www.jfa.jp/eng/about_jfa/organization/databox/team.html).

284 20. Balyi I, Way R, Higgs C. Long-term athlete development. 1<sup>st</sup> ed. Champaign: Human  
285 Kinetics; 2013.

286

287

288

289

290

291

292

293

294

295

296

297

298

299

300

301

302

303

304

305
